# Supplementary material for: Textile electrodes woven by carbon nanotube–graphene hybrid fibers for flexible electrochemical capacitors
Source: Royal Society of Chemistry journal article supplement (doi:10.1039/c3nr00320e), 2013-01-01
Supplement: c3nr00320e.pdf [file c3nr00320e.pdf]

Electronic Supplementary Information

**Textile Electrodes Woven by Carbon Nanotube/Graphene Hybrid Fibers for Flexible Electrochemical Capacitors**

*Huhu Cheng, Zelin Dong, Chuangang Hu, Yang Zhao, Yue Hu, Liangti Qu\*, Nan Chen, and Liming Dai\**

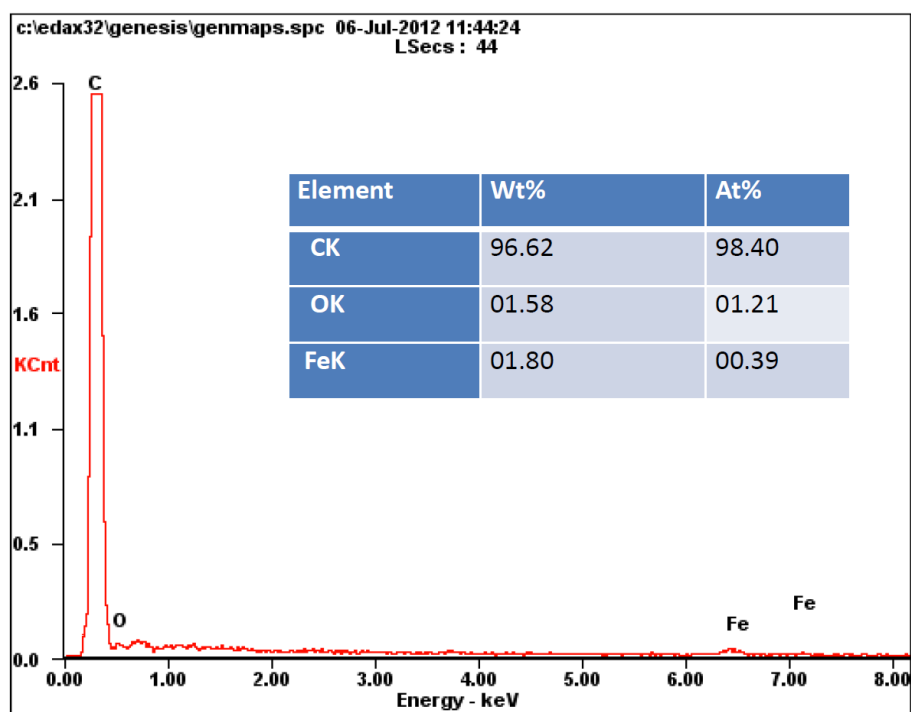

**Figure S1.** EDS of CNT/G fibers and the corresponding element content.

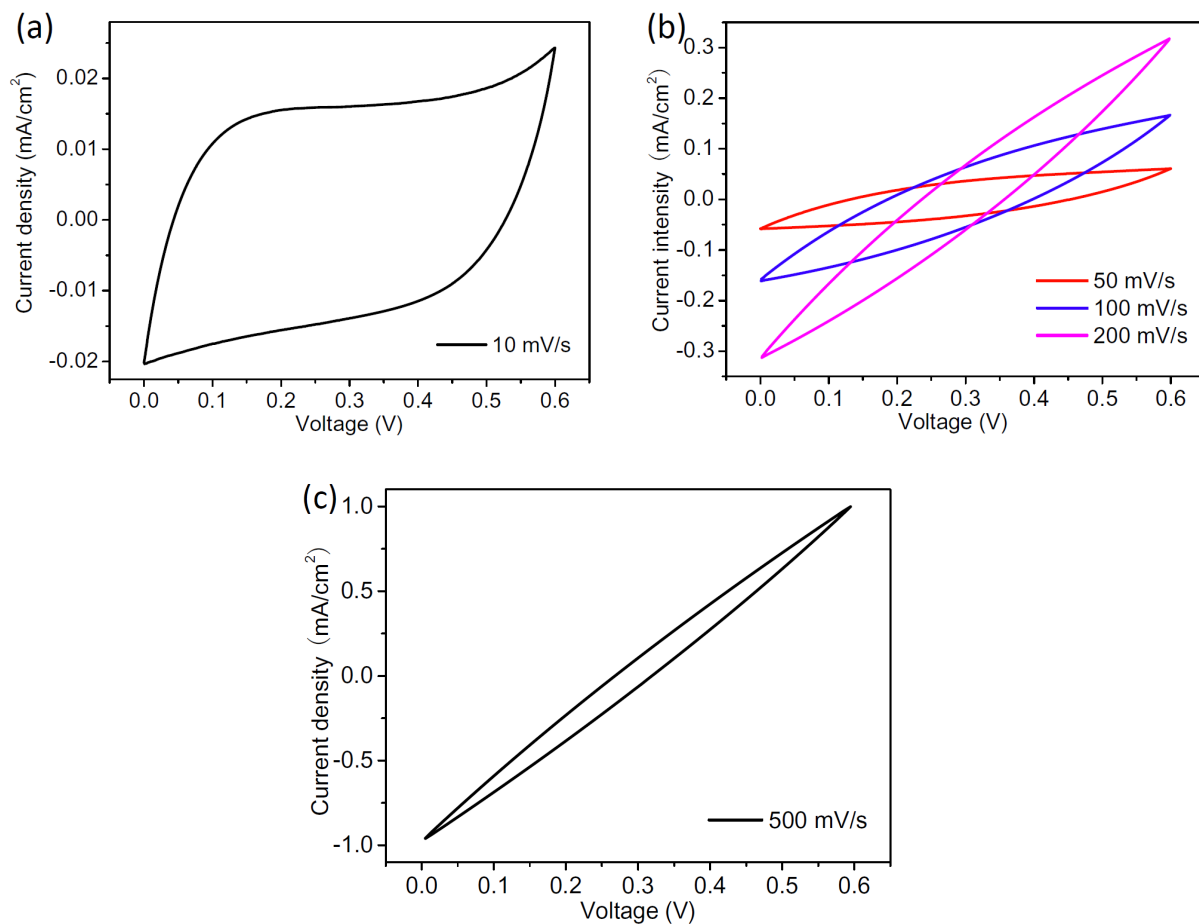

**Figure S2.** The CV curves of the neat graphene fiber at scan rate of 10 mV/s (a), 50–200 mV/s (b), and 500 mV/s (c) in 1M Na<sub>2</sub>SO<sub>4</sub> aqueous solution.

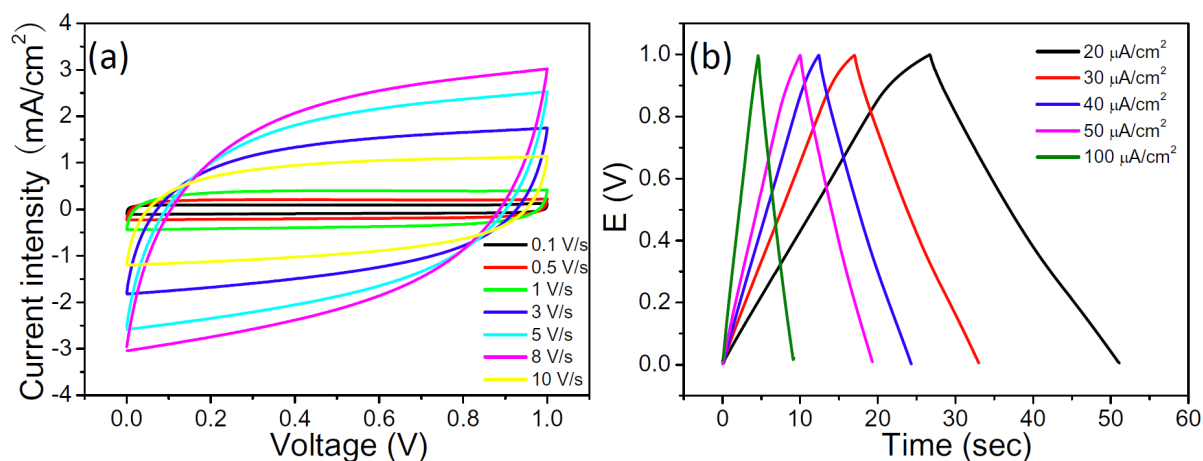

**Figure S3.** (a) CV curves of the supercapacitor of CNT/G fiber textile under the scan rate ranging from 0.1 to 10 V/s. (b) The galvanostatic charge-discharge curves at current density of 20-100  $\mu$  A/cm<sup>2</sup> of CNT/G fiber textile supercapacitor.

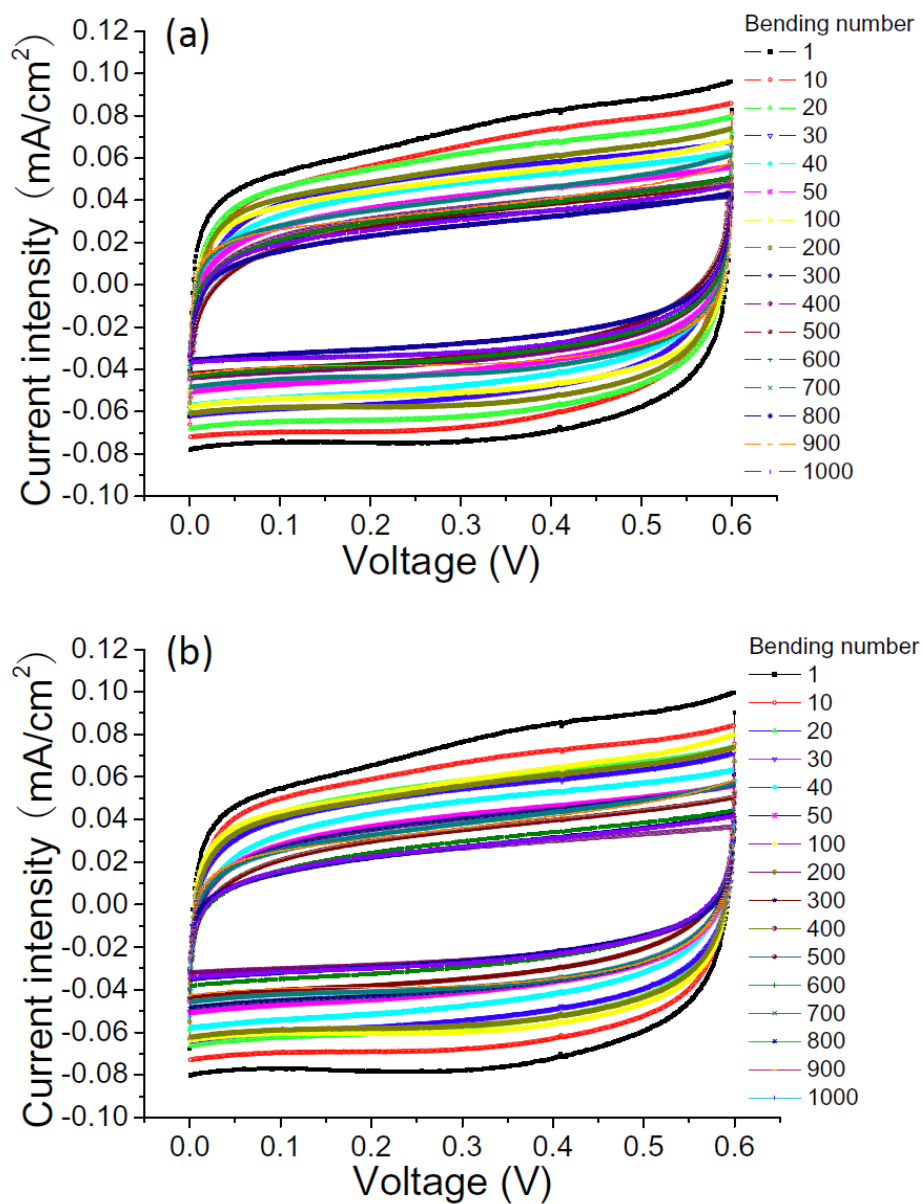

**Figure S4.** CV curves of CNT/G fiber textile supercapacitor undergoing the repeated flat-to-bending cycles at 200 mV/s scan rate in the flat (a) and the bending (b) states.

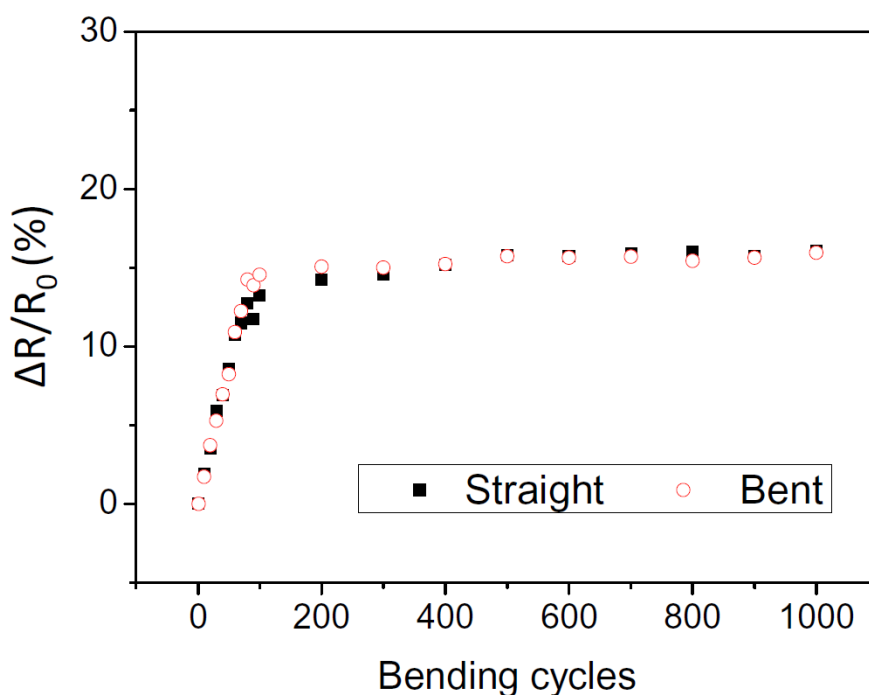

**Figure S5.** Electrical-resistance change of a CNT/G fiber upon the repeated bending for 1000 cycles.

**Table S1.** Typical EDL capacitance of some carbonaceous materials.

| Materials               | Current density and/or scan rate | Electrode system | Capacitance (F/g) | Ref. |
|-------------------------|----------------------------------|------------------|-------------------|------|
| N-doped graphene        | 1–33A/g, 20mV/s                  | Two              | 165–282           | [s1] |
| N-doped graphene        | 0.5 –15A/g, 5mV/s                | Two              | 99.6–145          | [s2] |
| Graphene aerogel        | 0.05A/g                          | Two              | 128               | [s3] |
| Graphene foam           | 0.5A/g                           | Two              | 110               | [s4] |
| Graphene hydrogel       | 1A/g, 10mV/s & 20mv/s            | Two              | 160±5             | [s5] |
| 3D macroporous Graphene | 1A/g, 50mV/s                     | Three            | 202               | [s6] |

|                                         |                            |       |                                     |                    |
|-----------------------------------------|----------------------------|-------|-------------------------------------|--------------------|
| Exfoliated graphene                     | 0.1A/g                     | Two   | ~150                                | [s7]               |
| Exfoliated graphitic oxide              | 100mV/s                    | Two   | 117                                 | [s8]               |
| Chemical converted graphene sheets      | 0~100A/g,<br>2.0~10.0 V /s | Two   | 175–273                             | [s9]               |
| Laser reduction of graphite oxide films | < 10A/g                    | Two   | ~276                                | [s10]              |
| Chemically modified graphene            |                            | Two   | 135–128                             | [s11]              |
| Graphene paper                          | 1A/g, 5mV/s                | Two   | 122                                 | [s12]              |
| Graphene composite                      | 1A/g, 10-50mV/s            | Two   | 100–250                             | [s13]              |
| Graphene composite                      | 0.1A/g                     | Two   | 205                                 | [s14]              |
| Graphene/Multiwalled -CNTs              | 2A/g                       | Two   | ca. 150                             | [s15]              |
| Graphene/Multiwalled -CNTs              | 0.1A/g                     | Two   | 318                                 | [s16]              |
| Graphene/Multiwalled -CNTs              | 20mV/s                     | Three | 326.5                               | [s17]              |
| Graphene/Single walled-CNTs             | 1A/g                       | Two   | 222                                 | [s18]              |
| Graphene/Single walled-CNTs             | 0.5A/g                     | Two   | 290.4 (aqueous),<br>201.0 (organic) | [s19]              |
| Graphene/CNFs                           | 1.25A/g                    | Three | 197                                 | [s20]              |
| Carbon nanotubes (CNTs)                 |                            |       | <135                                | [s21, s22,<br>s23] |
| Activated carbon fibers (ACFs)          |                            |       | <370                                | [s21, s22]         |
| Carbon cloth                            |                            |       | <200                                | [s21]              |

## References

- s1 H. Mo. Jeong, J. W. Lee, W. H. Shin, Y. J. Choi, H. J. Shin, J. K. Kang and J. W. Choi, *Nano Lett.* 2011, **11**, 2472.
- s2 Y. C. Qiu, X. F. Zhang and S. H. Yang, *Phys. Chem. Chem. Phys.* 2011, **13**, 12554.
- s3 X. T. Zhang, Z. Y. Sui, B. Xu, S. F. Yue, Y. J. Luo, W. C. Zhan and B. Liu, *J. Mater. Chem.* 2011, **21**, 6494.
- s4 Z. Q. Niu, J. Chen, H. H. Hng, J. Ma and X. D. Chen, *Adv. Mater.* 2012, **24**, 4144.
- s5 Y. Xu, K. X. Sheng, C. Li and G. Q. Shi, *ACS Nano* 2010, **4**, 4324.
- s6 B. G. Choi, M. H. Yang, W. H. Hong, J. W. Choi and Y. S. Huh, *ACS Nano* 2012, **6**, 4020.
- s7 W. StorageLv, D. M. Tang, Y. B. He, C. H. You, Z. Q. Shi, X. C. Chen, C. M. Chen, P. X. Hou, C. Liu and Q. H. Yang, *ACS Nano* 2009, **3**, 3730.
- s8 S. R. C. Vivekchand, S. R. Chandra, K. S. Subrahmanyam, A. Govindaraj and C. N. R. Rao, *J Chem Sci* 2008, **120**, 9.
- s9 X. Yang, J. Zhu, L. Qiu and D. Li, *Adv. Mater.* 2011, **23**, 2833.
- s10 M. F. El-Kady, V. Strong, S. Dubin and R. B. Kaner, *Science* 2012, **335**, 1326.
- s11 M. D. Stoller, S. J. Park, Y. W. Zhu, J. An and R. S. Ruoff, *Nano Lett.* 2008, **8**, 3498.
- s12 Y. Zhu, M. D. Stoller, W. Cai, A. Velamakanni, R. D. Piner, D. Chen and R. S. Ruoff, *ACS Nano* 2010, **4**, 1227.
- s13 C. G. Liu, Z. Yu, D. Neff, A. Zhamu and B. Z. Jang, *Nano Lett.* 2010, **10**, 4863.
- s14 Y. Wang, Z. Q. Shi, Y. Huang, Y. F. Ma, C. Y. Wang, M. M. Chen and Y. S. Chen, *J. Phys. Chem. C* 2009, **113**, 13103.
- s15 L. W. Peng, Y. Y. Feng, P. Lv, D. Lei, Y. T. Shen, Y. Li, and Wei Feng, *J. Phys. Chem. C* 2012, **116**, 4970.
- s16 Y. Wang, Y. P. Wu, Y. Huang, F. Zhang, X. Yang, Y. F. Ma and Y. S. Chen, *J. Phys. Chem. C* 2011, **115**, 23192.

- s17 S. Y. Yang, K. H. Chang, H. W. Tien, Y. F. Lee, S. M. Li, Y. S. Wang, J. Y. Wang, C. C. M. Ma and C. C. Hu, *J. Mater. Chem* 2011, **21**, 2374.
- s18 N. J. P. Ramesh, E. Bekyarova, M. E. Itkis and R. C. Haddon, *Adv. Energy Mater.* 2012, **2**, 438.
- s19 Q. Cheng, J. Tang, J. Ma, H. Zhang, N. Shinya and L. C. Qin, *Phys. Chem. Chem. Phys.* 2011, **13**, 17615.
- s20 Z. X. Tai, X. B. Yan, J. W. Lang and Q. J. Xue, *J. Power Sources* 2012, **199**, 373.
- s21 L. L. Zhang and X. S. Zhao, *Chem. Soc. Rev.* 2009, **38**, 2520.
- s22 Y. Q. Sun, Q. Wu and G. Q. Shi, *Energy Environ. Sci.* 2011, **4**, 1113.
- s23 Y. P. Zhai, Y. Q. Dou, D. Y. Zhao, P. F. Fulvio, R. T. Mayes and S. Dai, *Adv. Mater.* 2011, **23**, 4828.
